# Supplementary material
Source: Frontiers journal article supplement (https://www.frontiersin.org/articles/286842)
Supplement: Image_1.PDF [file Image_1.PDF]

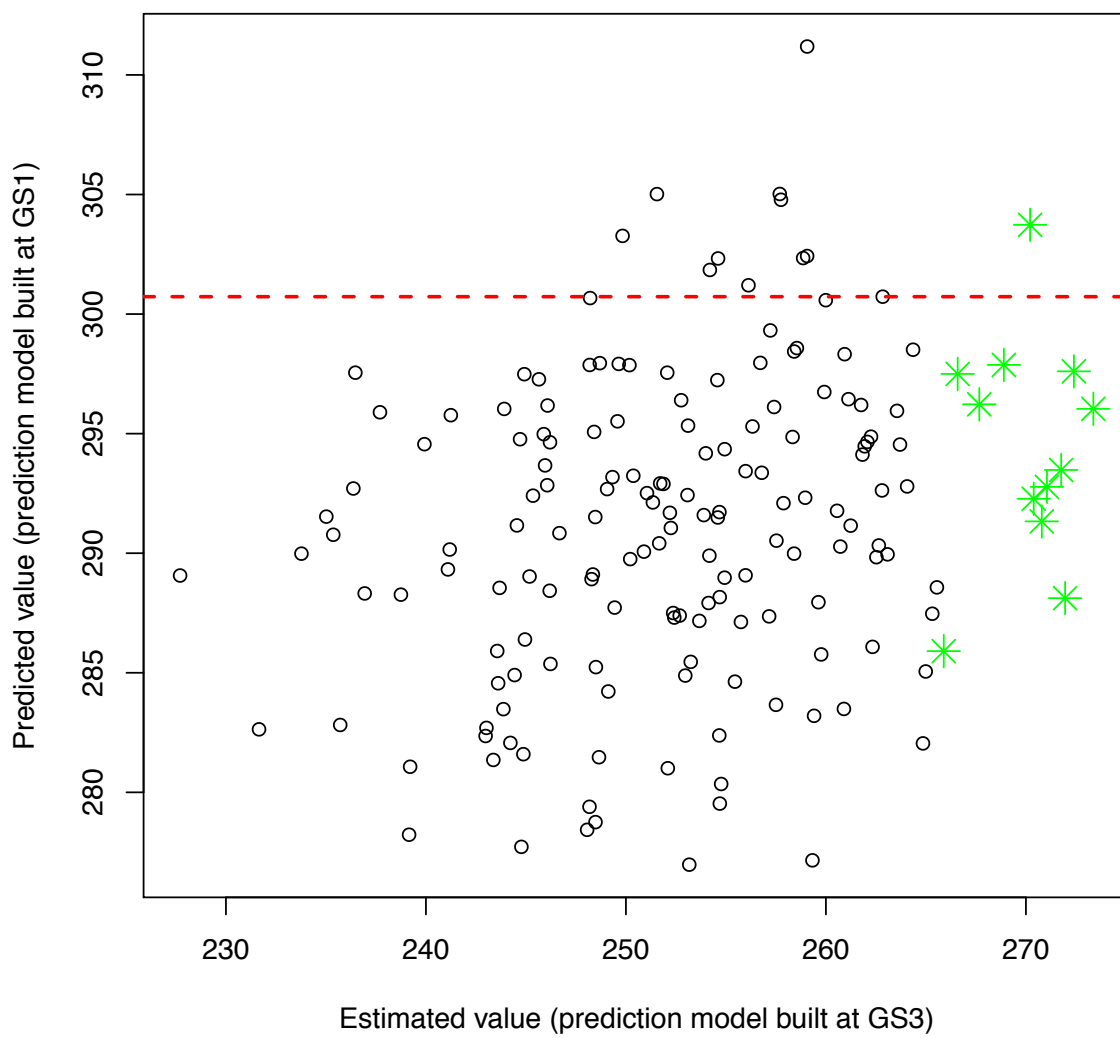

**Supplementary Figure S1.** The relationship between the estimated (i.e., values calculated using the updated model built at GS3) and predicted values (i.e., values calculated using the non-updated model built at GS1) of selection candidates at GS3. The red horizontal line represents the selection threshold when the non-updated model was used. Green asterisks represent the genotypes that were selected at GS3 based on the estimation by the updated model.
